# Supplementary material for: Synthesis and Properties of NitroHPHAC: The First Example of Substitution Reaction on HPHAC
Source: PubMed Central journal article supplement (PMC7321187; doi:10.3390/molecules25112486), 2020-05-27
Supplement: molecules-25-02486-s001.pdf [file molecules-25-02486-s001.pdf]

*Supporting information*

## **Synthesis and properties of nitroHPHAC: The first example of substitution reaction of HPHAC**

Yoshiki Sasaki, Masayoshi Takase\*, Shigeki Mori, and Hidemitsu Uno\*

Graduate School of Science and Engineering, Ehime University, Matsuyama 790-8577, Japan

E-mail: takase.masayoshi.ry@ehime-u.ac.jp

E-mail: uno@ehime-u.ac.jp

### **Contents**

|                                                                                                                  |        |
|------------------------------------------------------------------------------------------------------------------|--------|
| 1. NMR spectra                                                                                                   | p. S2  |
| 2. Mass spectra                                                                                                  | p. S4  |
| 3. IR spectra                                                                                                    | p. S6  |
| 4. Solvatochromism and dipole moments                                                                            | p. S8  |
| 5. X-ray crystal structures                                                                                      | p. S9  |
| 6. Comparison of the <sup>1</sup> H-NMR spectra of <b>2a</b> , <b>2a<sup>2+</sup></b> and <b>1a<sup>2+</sup></b> | p. S13 |
| 7. TD-DFT calculations                                                                                           | p. S14 |
| 8. ACID plots and NICS calculations                                                                              | p. S19 |
| 9. Possible resonance effect of <b>2b</b>                                                                        | p. S20 |
| 10. Atomic coordinates of the optimized structures                                                               | p. S21 |
| 11. References                                                                                                   | p. S25 |

## 1. NMR spectra

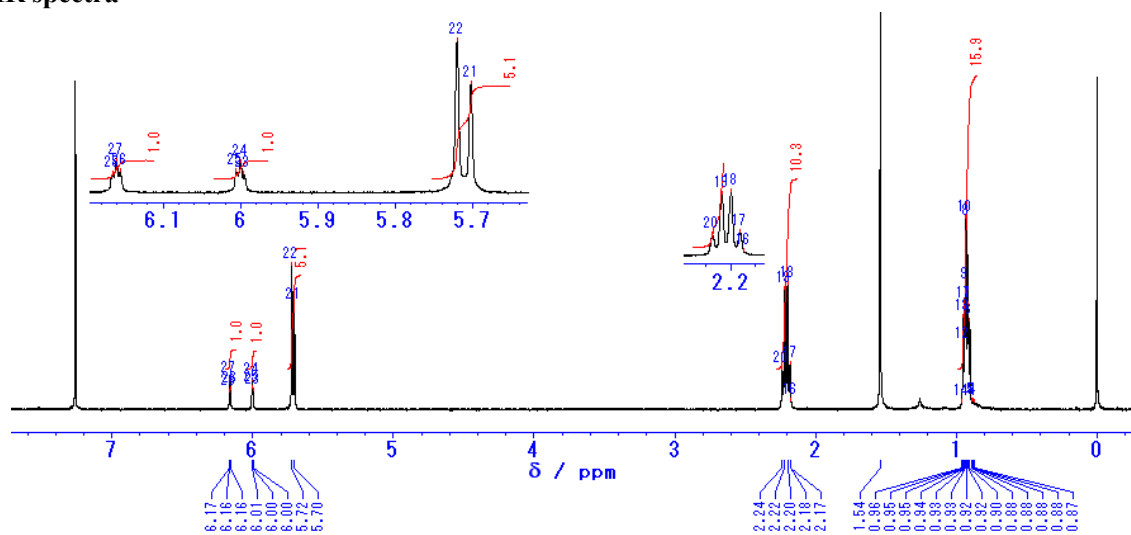

Figure S1a. <sup>1</sup>H-NMR spectrum of DEHPB in CDCl<sub>3</sub>

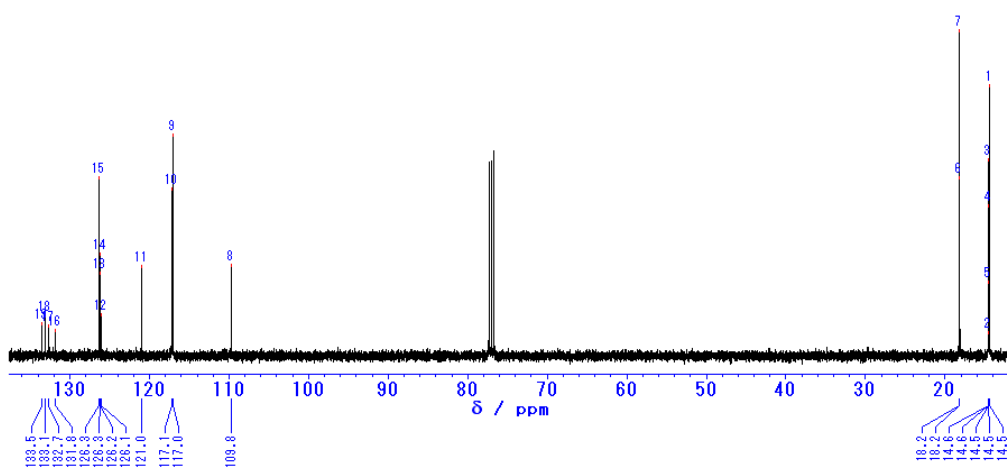

Figure S1b. <sup>13</sup>C-NMR spectrum of DEHPB in CDCl<sub>3</sub>

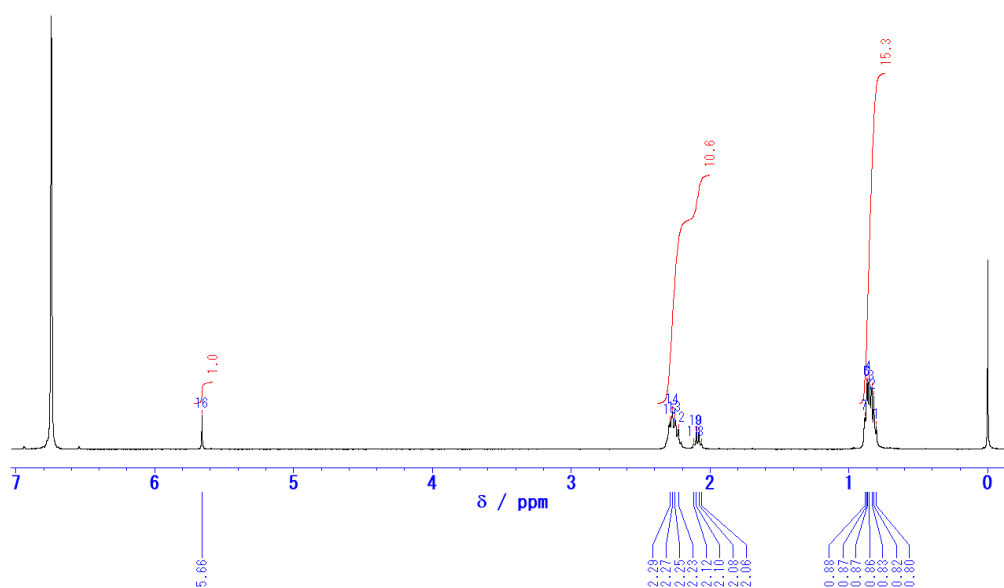

Figure S1c. <sup>1</sup>H-NMR spectrum of DEHPAC 1a in C<sub>6</sub>D<sub>6</sub>

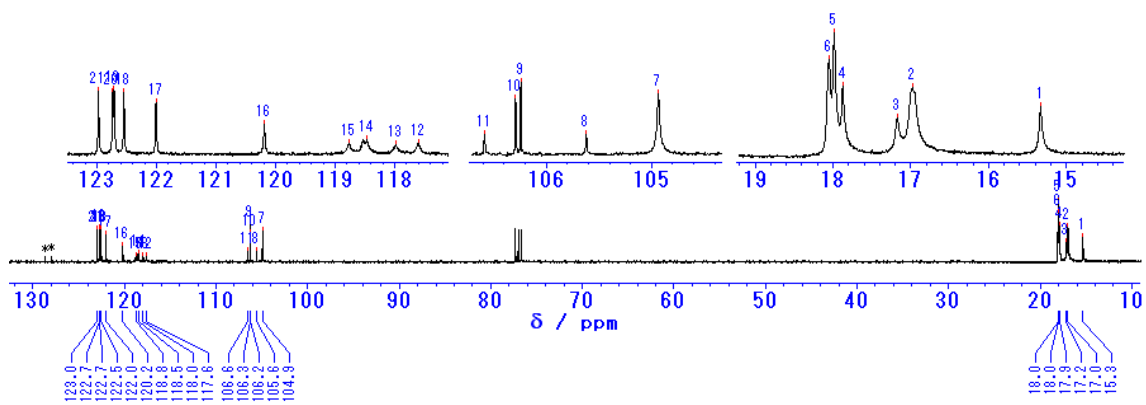

Figure 1d.  $^{13}\text{C-NMR}$  spectrum of DEHPHAC **1a** in  $\text{CDCl}_3$  and  $\text{CS}_2$

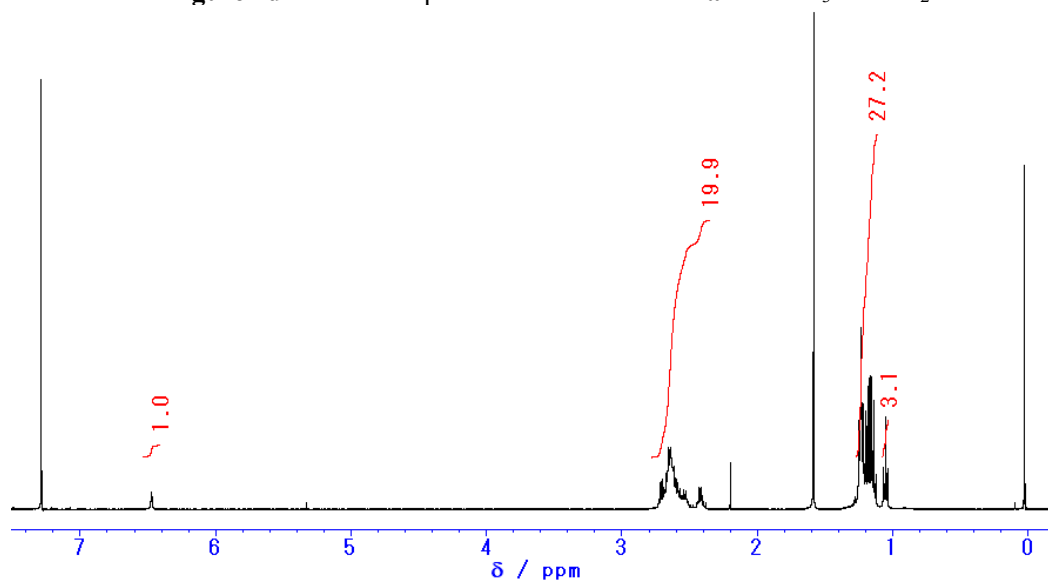

Figure S1e.  $^1\text{H-NMR}$  spectrum of **2a** in  $\text{CDCl}_3$ .

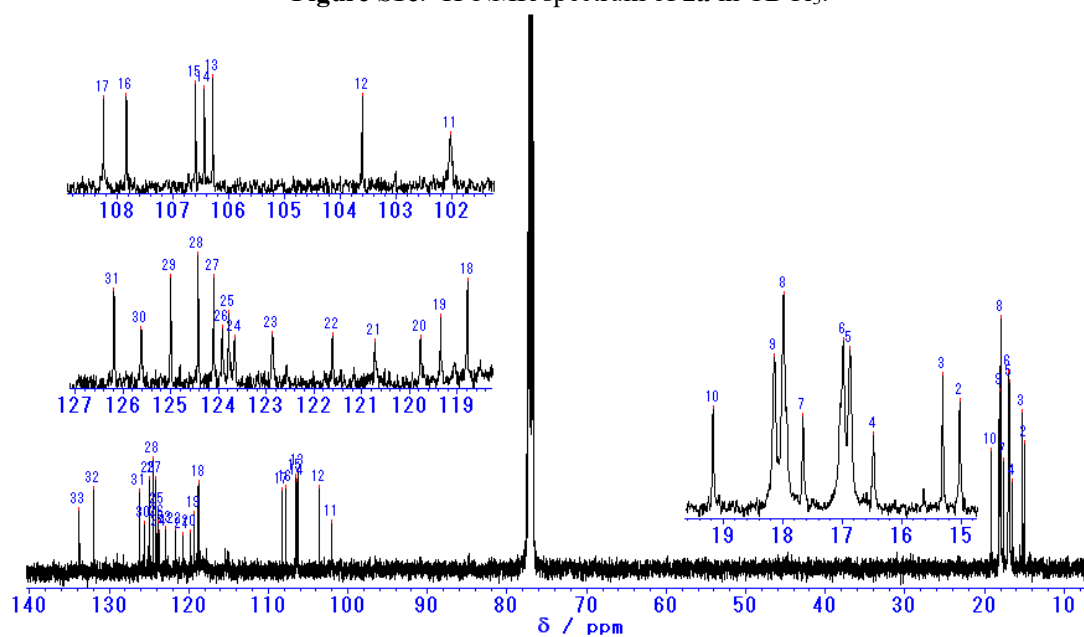

Figure S1f.  $^{13}\text{C-NMR}$  spectrum of **2a** in  $\text{CDCl}_3$  (The signals of central benzene moiety were not observed.).

## 2. Mass spectra

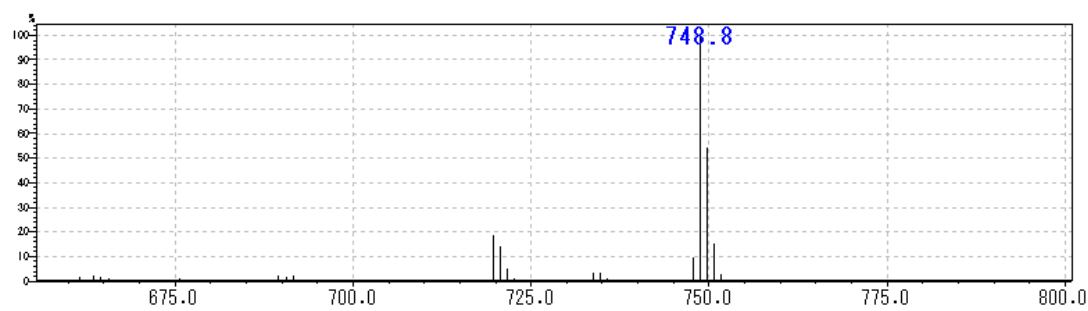

**Figure S2a.** DI-MS of DEHPB (Exact mass: 748.5192)

[ Mass Spectrum ]  
Data : 20171017035 Date : 19-Oct-2017 14:52  
Instrument : MS700D  
Sample : HPHACbipy  
Note : 3-Nitrobenzyl Alcohol  
Inlet : Direct Ion Mode : FAB+  
Spectrum Type : Normal Ion [MF-Linear]  
RT : 2.67 min Scan# : (58,76) Temp : 3276.7 deg.C  
BP : m/z 736.4287 Int. : 19958.89 (209283936)  
Output m/z range : 670 to 780 Cut Level : 0.00 %

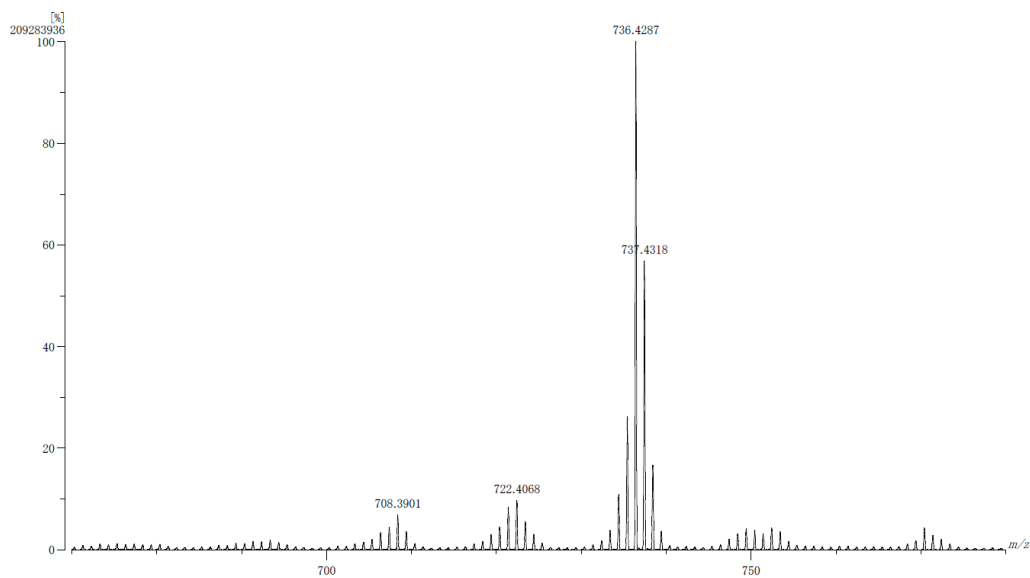

**Figure S2b.** HR-LDI-TOF MS of DEHPAC **1a** (Exact mass: 736.4253)

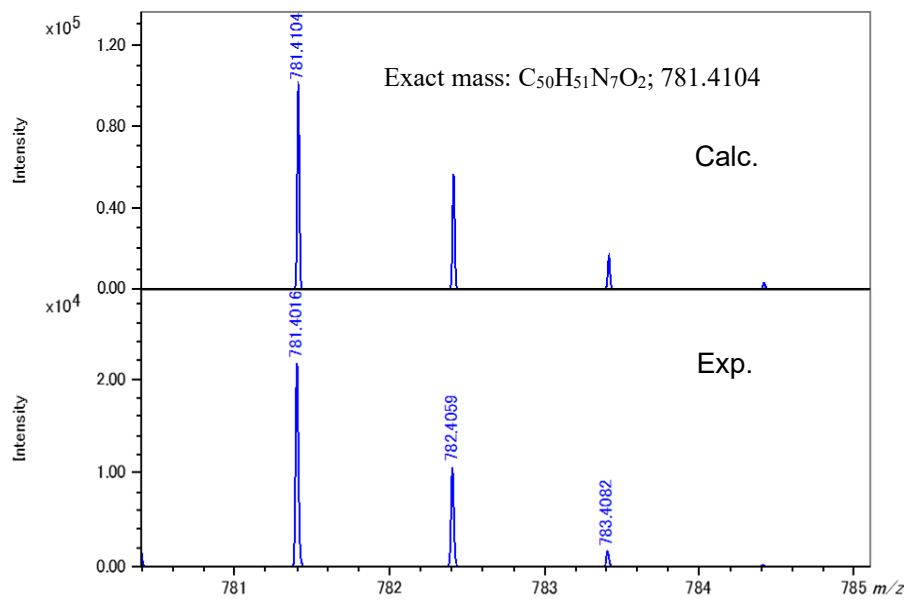

**Figure S2c.** High-resolution LDI-TOF mass spectrum of **2a** (Top: simulated, Bottom: observed).

### 3. IR spectra

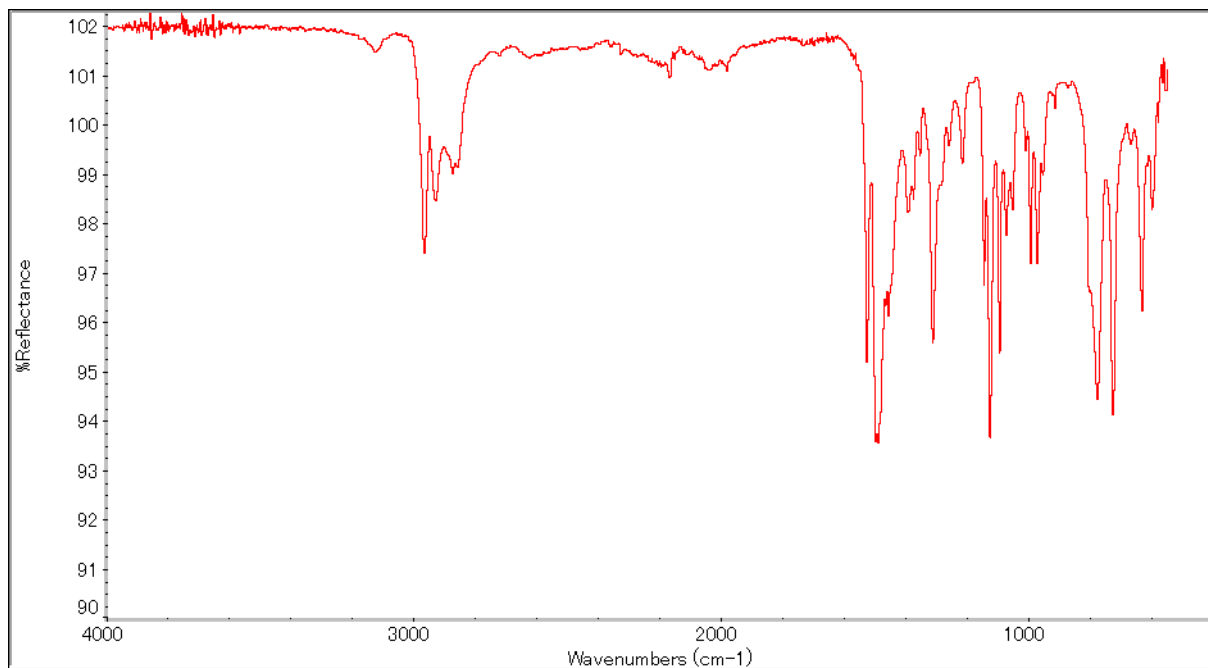

**Figure S3a.** IR spectrum of DEHPB

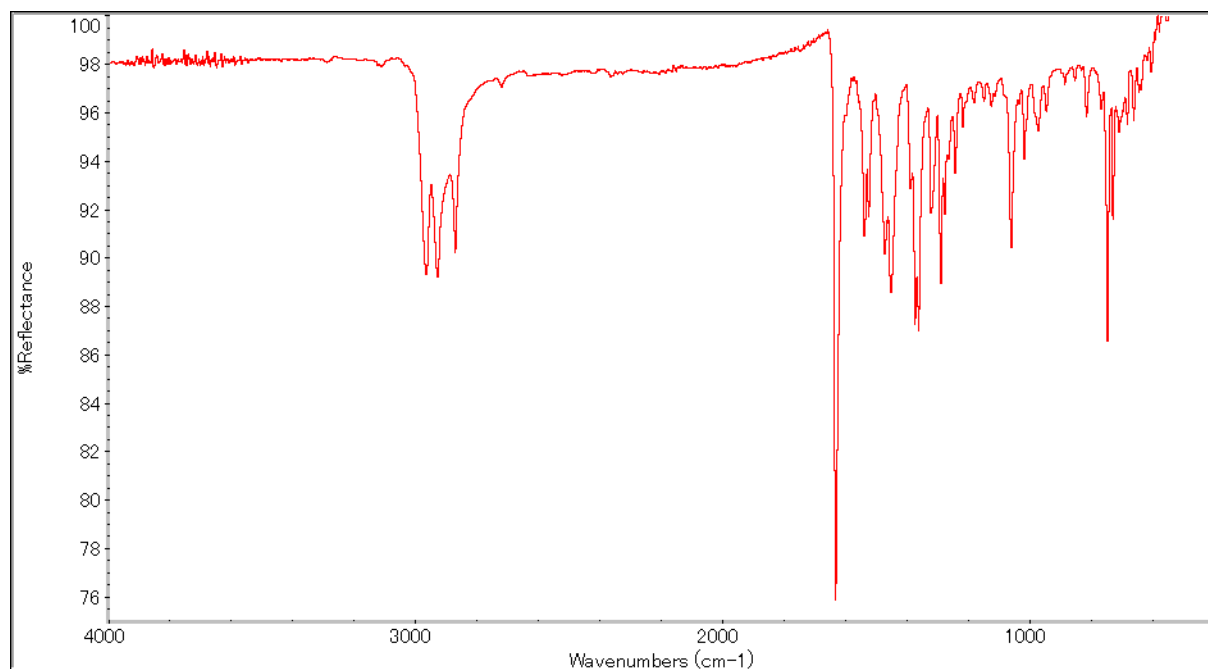

**Figure S3b.** IR spectrum of DEHPAC 1a

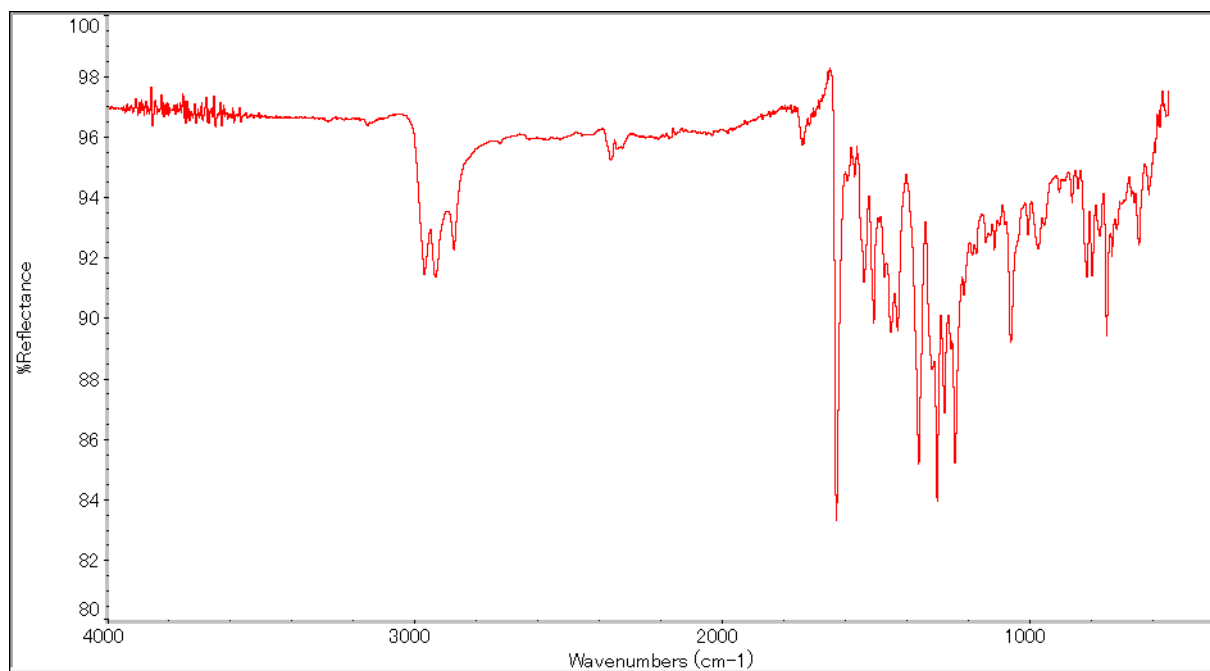

**Figure S3c.** IR spectrum of **2a**

#### 4. Solvatochromism and dipole moments

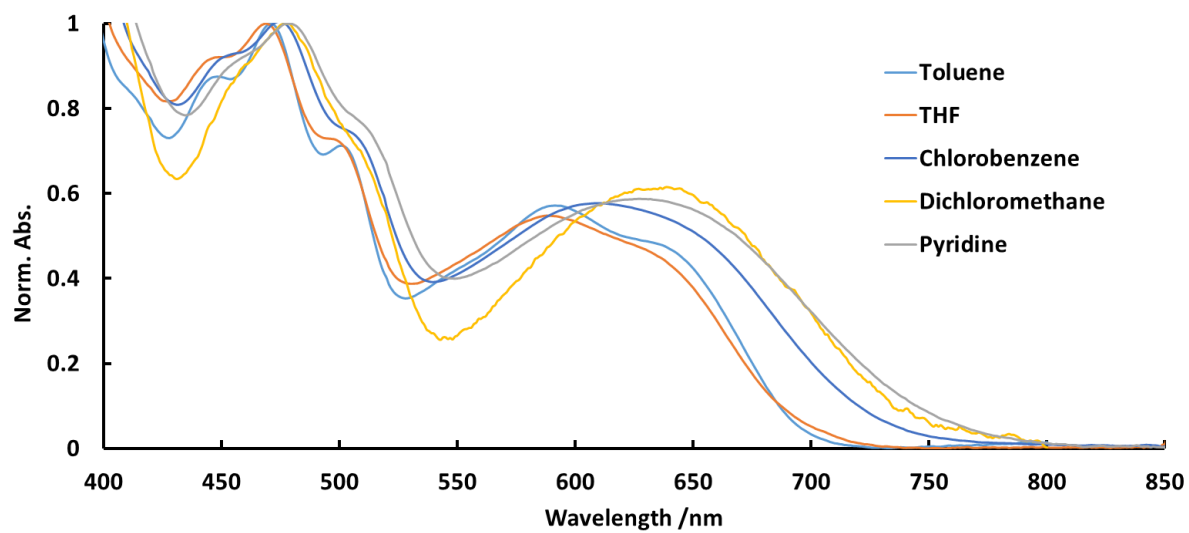

Figure S4a. Absorption spectra of **2a** in various solvents.

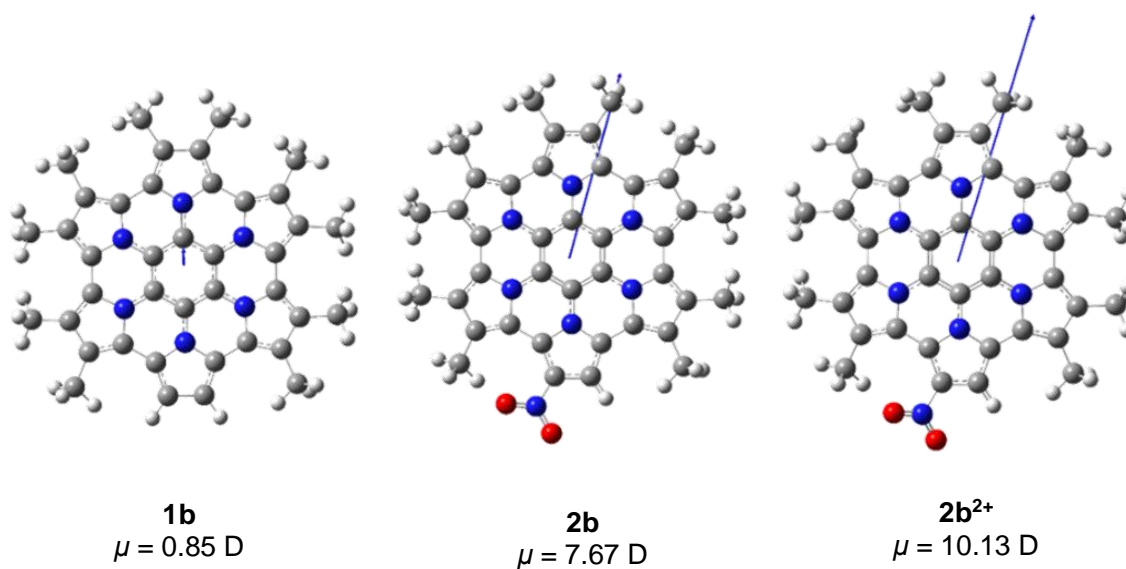

Figure S4b. Dipole moments of **1b**, **2b** and **2b<sup>2+</sup>** (Calculated by B3LYP/6-31G(d,p))



## 5. X-ray crystal structures<sup>[S1]</sup>

X-ray diffraction data were taken on Rigaku Varimax with Saturn724 diffractometer using multilayer mirror monochromated Mo K $\alpha$  radiation ( $\lambda = 0.71073 \text{ \AA}$ ) at  $100 \pm 1 \text{ K}$ . The crystals were mounted in cryoloops. Data collection was performed using CrystalClear software. Data reduction was performed using CrysAlisPro software. The data were corrected for Lorentz polarization and absorption effects. Structures were solved by using the processed data with Shelxt. All calculations were performed using the Rigaku CrystalStructure crystallographic software package.

### Neutral

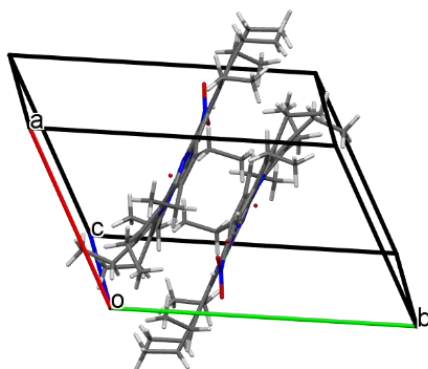

Figure S5a. Packing structure of **2a**

Table S4a. Crystallographic refinement data for **2a**

|                              |                                                                                                                                                                                     |
|------------------------------|-------------------------------------------------------------------------------------------------------------------------------------------------------------------------------------|
| Formula                      | C <sub>50</sub> H <sub>51</sub> N <sub>7</sub> O <sub>2</sub>                                                                                                                       |
| Formula weight               | 782.00                                                                                                                                                                              |
| Size                         | 0.250×0.030×0.020 mm                                                                                                                                                                |
| Radiation                    | MoK $\alpha$                                                                                                                                                                        |
| Temperature                  | 100 K                                                                                                                                                                               |
| Crystal system               | triclinic                                                                                                                                                                           |
| Space group                  | $P \bar{1}$ (#2)                                                                                                                                                                    |
| Unit cell dimensions         | a = 9.5224(4) $\text{\AA}$<br>b = 14.7625(5) $\text{\AA}$<br>c = 15.9432(6) $\text{\AA}$<br>$\alpha = 112.352(3)^\circ$<br>$\beta = 96.259(3)^\circ$<br>$\gamma = 108.189(3)^\circ$ |
| Volume                       | 1901.95(15) $\text{\AA}^3$                                                                                                                                                          |
| Z                            | 2                                                                                                                                                                                   |
| Density (calculated)         | 1.365 g·cm <sup>-3</sup>                                                                                                                                                            |
| Absorption coefficient       | 0.085 mm <sup>-1</sup>                                                                                                                                                              |
| F(000)                       | 832.00                                                                                                                                                                              |
| Reflections collected        | 31486                                                                                                                                                                               |
| Independent reflections      | 8725                                                                                                                                                                                |
| R <sub>int</sub>             | 0.0449                                                                                                                                                                              |
| R <sub>I</sub> [I>2sigma(I)] | 0.0530                                                                                                                                                                              |

|                                   |         |
|-----------------------------------|---------|
| wR <sub>2</sub> (All reflections) | 0.1412  |
| GOF                               | 1.026   |
| CCDC No.                          | 1989640 |

## Radical cation

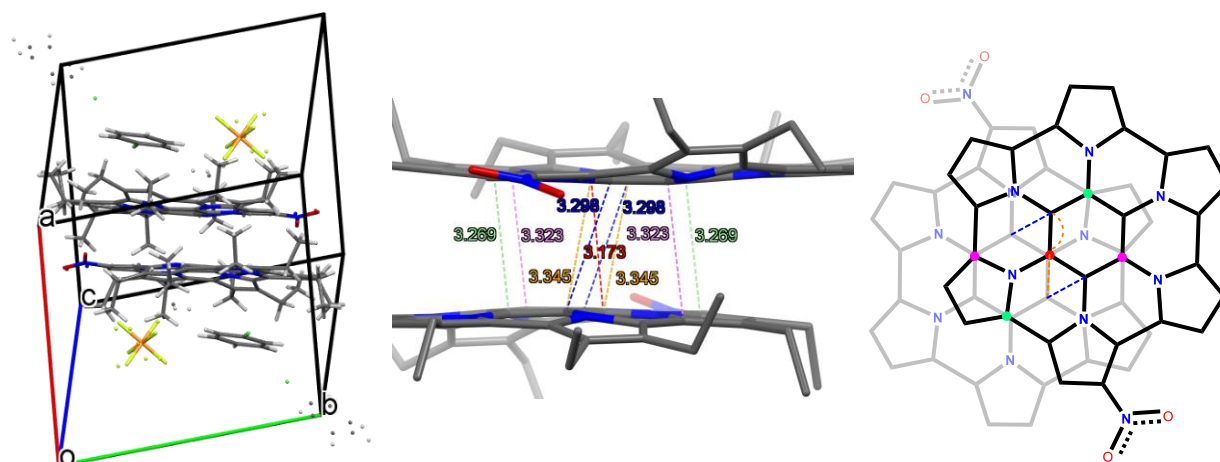

**Figure S5b.** Packing structure of  $2a^{+\bullet}$  and interatomic distances ( $< 3.4 \text{ \AA}$ ) in the  $\pi$ -dimeric structure.

**Table S5b.** Crystallographic refinement data for  $2a^{+\bullet}$

|                           |                                                                                                                                                                                       |
|---------------------------|---------------------------------------------------------------------------------------------------------------------------------------------------------------------------------------|
| Formula                   | $2C_{50}H_{51}N_7O_2 \cdot 3C_6H_5Cl \cdot 2PF_6$                                                                                                                                     |
| Formula weight            | 2191.60                                                                                                                                                                               |
| Size                      | $0.120 \times 0.060 \times 0.050 \text{ mm}$                                                                                                                                          |
| Radiation                 | MoK $\alpha$                                                                                                                                                                          |
| Temperature               | 100 K                                                                                                                                                                                 |
| Crystal system            | triclinic                                                                                                                                                                             |
| Space group               | $P \bar{1}$ (#2)                                                                                                                                                                      |
| Unit cell dimensions      | $a = 12.8159(5) \text{ \AA}$<br>$b = 13.8592(5) \text{ \AA}$<br>$c = 15.2281(5) \text{ \AA}$<br>$\alpha = 79.519(3)^\circ$<br>$\beta = 71.137(3)^\circ$<br>$\gamma = 84.007(3)^\circ$ |
| Volume                    | $2513.80(16) \text{ \AA}^3$                                                                                                                                                           |
| Z                         | 1                                                                                                                                                                                     |
| Density (calculated)      | $1.448 \text{ g} \cdot \text{cm}^{-3}$                                                                                                                                                |
| Absorption coefficient    | $0.211 \text{ mm}^{-1}$                                                                                                                                                               |
| F(000)                    | 1144.00                                                                                                                                                                               |
| Reflections collected     | 41723                                                                                                                                                                                 |
| Independent reflections   | 11525                                                                                                                                                                                 |
| $R_{int}$                 | 0.0439                                                                                                                                                                                |
| $R_I [I > 2\sigma(I)]$    | 0.0698                                                                                                                                                                                |
| w $R_2$ (All reflections) | 0.1767                                                                                                                                                                                |
| GOF                       | 1.024                                                                                                                                                                                 |
| CCDC No.                  | 1989647                                                                                                                                                                               |

## Dication

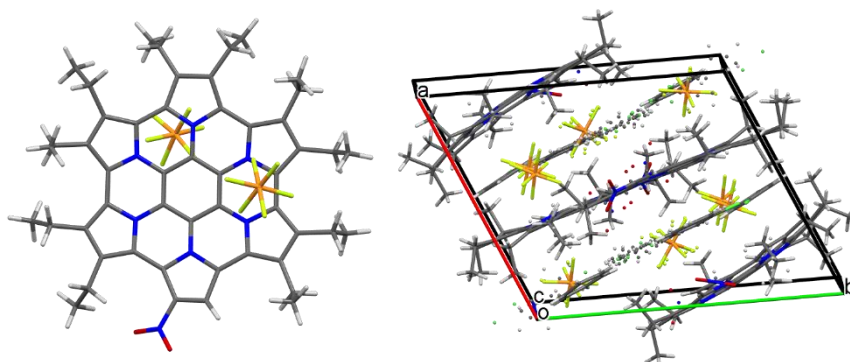

Figure S5c. Molecular structure and packing structure of  $2a^{2+}$

Table S5c. Crystallographic refinement data for  $2a^{2+}$

|                                   |                                                                                                                                        |
|-----------------------------------|----------------------------------------------------------------------------------------------------------------------------------------|
| Formula                           | $2C_{50}H_{51}N_7O_2 \cdot 6(C_6H_5Cl) \cdot 4(PF_6)$                                                                                  |
| Formula weight                    | 2819.20                                                                                                                                |
| Size                              | 0.120×0.030×0.020 mm                                                                                                                   |
| Radiation                         | MoK $\alpha$                                                                                                                           |
| Temperature                       | 100 K                                                                                                                                  |
| Crystal system                    | triclinic                                                                                                                              |
| Space group                       | $P \bar{1}$ (#2)                                                                                                                       |
| Unit cell dimensions              | a = 14.4794(4) Å<br>b = 17.5827(4) Å<br>c = 26.8407(7) Å<br>$\alpha$ = 92.852(2) °<br>$\beta$ = 92.808(2) °<br>$\gamma$ = 113.182(2) ° |
| Volume                            | 6256.3(3) Å <sup>3</sup>                                                                                                               |
| Z                                 | 2                                                                                                                                      |
| Density (calculated)              | 1.496 g·cm <sup>-3</sup>                                                                                                               |
| Absorption coefficient            | 0.287 mm <sup>-1</sup>                                                                                                                 |
| F(000)                            | 2912.00                                                                                                                                |
| Reflections collected             | 103951                                                                                                                                 |
| Independent reflections           | 28714                                                                                                                                  |
| $R_{int}$                         | 0.0701                                                                                                                                 |
| $R_I$ [ $I > 2\sigma(I)$ ]        | 0.0931                                                                                                                                 |
| wR <sub>2</sub> (All reflections) | 0.2492                                                                                                                                 |
| GOF                               | 1.048                                                                                                                                  |
| CCDC No.                          | 1989648                                                                                                                                |

## 6. Comparison of the $^1\text{H}$ -NMR spectra of $2\text{a}$ , $2\text{a}^{2+}$ and $1\text{a}^{2+}$

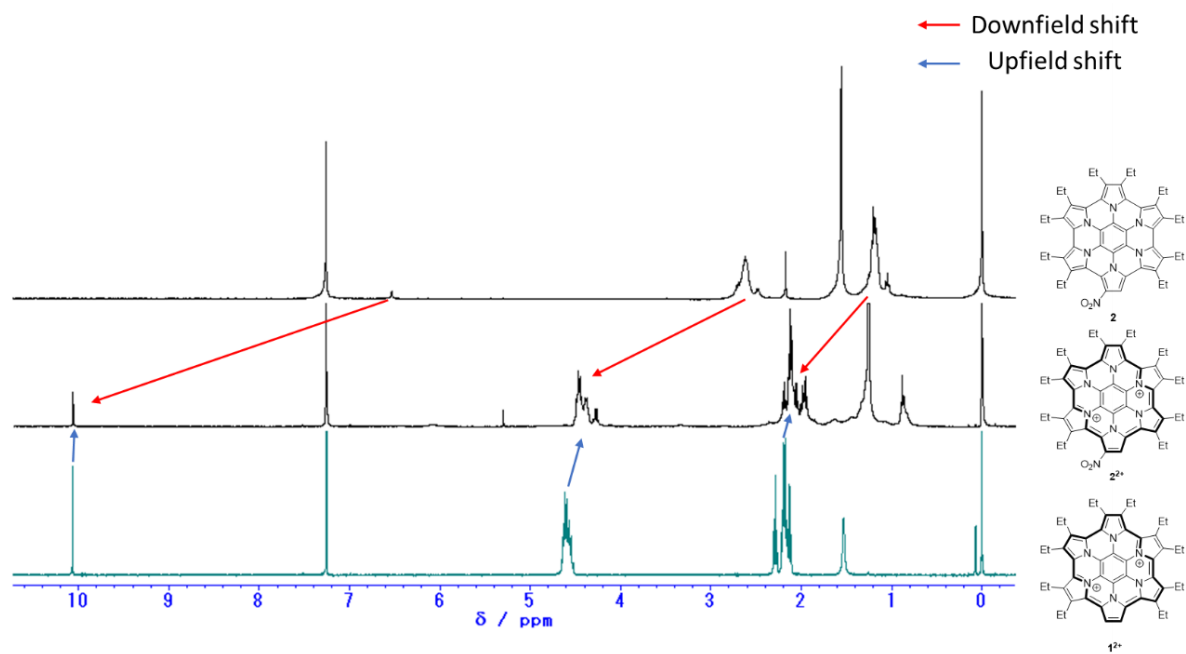

**Figure S6.**  $^1\text{H}$ -NMR spectra of **2a** (top), **2a<sup>2+</sup>** (middle), **1a<sup>2+</sup>** (bottom) in  $\text{CDCl}_3$ .

## 7. TD-DFT calculations

The GAUSSIAN 09<sup>[S2]</sup> series of programs was used for all calculations. All molecules were fully optimized using the hybrid density functional at B3LYP level of theory with the 6-31G(d,p) basis set. Frequency calculations were conducted to ensure that these structures were indeed local minima. TD-DFT calculations were performed at the B3LYP/6-31+G(d,p) level of theory under vacuum.

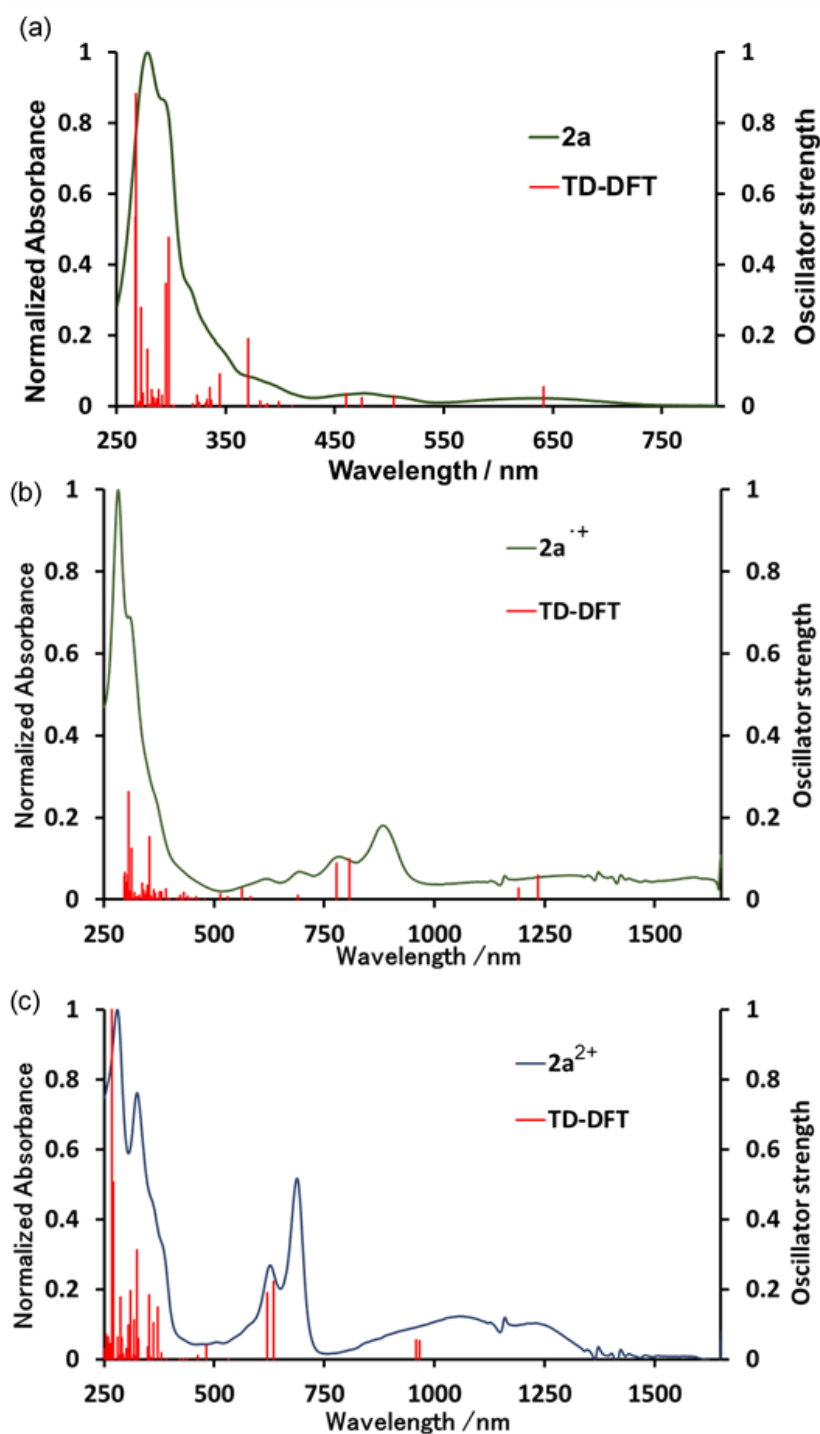

**Figure S7.** UV/Vis/NIR spectra and TD-DFT results of (a) **2a** and **2b**, (b) **2a<sup>+</sup>** and **2b<sup>+</sup>**, and (c) **2b<sup>2+</sup>** and **2b<sup>2+</sup>**, respectively. The calculations were performed at the B3LYP/6-31G+(d,p)//B3LYP/6-31G(d,p) level of theory.

**Table S7.** TD-DFT results of (a) **2b**, (b) **2b<sup>+</sup>** and (c) **2b<sup>2+</sup>**.(a) **2b** (HOMO = 168 and LUMO = 169)

|                  |           |           |           |          |              |
|------------------|-----------|-----------|-----------|----------|--------------|
| Excited State 1: | Singlet-A | 1.9325 eV | 641.58 nm | f=0.0543 | <S**2>=0.000 |
| 168 -> 169       | 0.68457   |           |           |          |              |
| 168 -> 170       | -0.14810  |           |           |          |              |

This state for optimization and/or second-order correction.

Total Energy, E(TD-HF/TD-KS) = -2076.62704338

Copying the excited state density for this state as the 1-particle RhoCI density.

|                  |           |           |           |          |              |
|------------------|-----------|-----------|-----------|----------|--------------|
| Excited State 2: | Singlet-A | 2.4595 eV | 504.10 nm | f=0.0277 | <S**2>=0.000 |
| 168 -> 169       | 0.14244   |           |           |          |              |
| 168 -> 170       | 0.68148   |           |           |          |              |

|                  |           |           |           |          |              |
|------------------|-----------|-----------|-----------|----------|--------------|
| Excited State 3: | Singlet-A | 2.6104 eV | 474.96 nm | f=0.0232 | <S**2>=0.000 |
| 166 -> 169       | 0.11468   |           |           |          |              |
| 167 -> 169       | 0.68293   |           |           |          |              |

|                  |           |           |           |          |              |
|------------------|-----------|-----------|-----------|----------|--------------|
| Excited State 4: | Singlet-A | 2.6934 eV | 460.33 nm | f=0.0342 | <S**2>=0.000 |
| 166 -> 169       | 0.68440   |           |           |          |              |
| 167 -> 169       | -0.11295  |           |           |          |              |

|                  |           |           |           |          |              |
|------------------|-----------|-----------|-----------|----------|--------------|
| Excited State 5: | Singlet-A | 3.0166 eV | 411.01 nm | f=0.0004 | <S**2>=0.000 |
| 168 -> 171       | 0.69286   |           |           |          |              |

|                  |           |           |           |          |              |
|------------------|-----------|-----------|-----------|----------|--------------|
| Excited State 6: | Singlet-A | 3.1080 eV | 398.92 nm | f=0.0113 | <S**2>=0.000 |
| 165 -> 169       | 0.25182   |           |           |          |              |
| 168 -> 172       | 0.64242   |           |           |          |              |

|                  |           |           |           |          |              |
|------------------|-----------|-----------|-----------|----------|--------------|
| Excited State 7: | Singlet-A | 3.1943 eV | 388.14 nm | f=0.0066 | <S**2>=0.000 |
| 165 -> 169       | 0.55415   |           |           |          |              |
| 166 -> 170       | -0.17238  |           |           |          |              |
| 167 -> 170       | -0.31406  |           |           |          |              |
| 168 -> 172       | -0.19785  |           |           |          |              |

|                  |           |           |           |          |              |
|------------------|-----------|-----------|-----------|----------|--------------|
| Excited State 8: | Singlet-A | 3.2083 eV | 386.45 nm | f=0.0011 | <S**2>=0.000 |
| 164 -> 169       | -0.17442  |           |           |          |              |
| 165 -> 169       | 0.14523   |           |           |          |              |
| 166 -> 170       | 0.60930   |           |           |          |              |
| 168 -> 172       | -0.14883  |           |           |          |              |
| 168 -> 173       | -0.15823  |           |           |          |              |

|                  |           |           |           |          |              |
|------------------|-----------|-----------|-----------|----------|--------------|
| Excited State 9: | Singlet-A | 3.2458 eV | 381.99 nm | f=0.0144 | <S**2>=0.000 |
| 164 -> 169       | 0.29930   |           |           |          |              |
| 165 -> 169       | 0.26755   |           |           |          |              |
| 166 -> 171       | -0.11337  |           |           |          |              |
| 167 -> 170       | 0.53437   |           |           |          |              |

|                   |           |           |           |          |              |
|-------------------|-----------|-----------|-----------|----------|--------------|
| Excited State 10: | Singlet-A | 3.3425 eV | 370.93 nm | f=0.1901 | <S**2>=0.000 |
| 164 -> 169        | 0.58094   |           |           |          |              |
| 165 -> 169        | -0.12874  |           |           |          |              |
| 166 -> 170        | 0.19736   |           |           |          |              |
| 166 -> 171        | 0.11391   |           |           |          |              |
| 167 -> 170        | -0.24139  |           |           |          |              |

167 -> 171      0.10893

(b)  $2b^{++}$  (SOMO = 168A)

Excited State 1: 2.003-A      1.0045 eV 1234.30 nm    f=0.0586     $\langle S^{**2} \rangle = 0.753$

164B -> 168B      -0.19050

167B -> 168B      0.97133

This state for optimization and/or second-order correction.

Total Energy, E(TD-HF/TD-KS) = -2076.45557973

Copying the excited state density for this state as the 1-particle RhoCI density.

Excited State 2: 2.009-A      1.0406 eV 1191.50 nm    f=0.0279     $\langle S^{**2} \rangle = 0.759$

165B -> 168B      -0.25309

166B -> 168B      0.95850

Excited State 3: 2.031-A      1.5366 eV 806.86 nm    f=0.0982     $\langle S^{**2} \rangle = 0.781$

164B -> 168B      0.20154

165B -> 168B      0.92782

166B -> 168B      0.22163

Excited State 4: 2.040-A      1.5923 eV 778.64 nm    f=0.0882     $\langle S^{**2} \rangle = 0.791$

164B -> 168B      0.94156

165B -> 168B      -0.19514

167B -> 168B      0.16601

Excited State 5: 2.119-A      1.7981 eV 689.53 nm    f=0.0102     $\langle S^{**2} \rangle = 0.872$

168A -> 169A      0.90799

168A -> 170A      -0.32243

163B -> 168B      -0.12260

Excited State 6: 2.090-A      2.1284 eV 582.53 nm    f=0.0064     $\langle S^{**2} \rangle = 0.842$

168A -> 169A      0.18880

168A -> 170A      0.19058

163B -> 168B      0.93694

Excited State 7: 2.526-A      2.2031 eV 562.78 nm    f=0.0260     $\langle S^{**2} \rangle = 1.345$

165A -> 169A      0.11231

166A -> 169A      0.23063

167A -> 169A      -0.11768

167A -> 170A      0.10107

168A -> 169A      0.17619

168A -> 170A      0.76710

163B -> 168B      -0.26788

166B -> 169B      -0.30904

167B -> 169B      0.21715

167B -> 170B      -0.15128

Excited State 8: 3.276-A      2.3345 eV 531.10 nm    f=0.0061     $\langle S^{**2} \rangle = 2.434$

166A -> 169A      -0.10107

167A -> 169A      -0.42876

167A -> 170A      0.21779

168A -> 169A      -0.12726



|                   |                                                   |
|-------------------|---------------------------------------------------|
| 168A -> 170A      | -0.21147                                          |
| 168A -> 172A      | 0.10525                                           |
| 168A -> 173A      | 0.13210                                           |
| 166B -> 169B      | 0.22036                                           |
| 167B -> 169B      | 0.68905                                           |
| 167B -> 170B      | -0.26284                                          |
| Excited State 9:  | 3.122-A 2.4079 eV 514.91 nm f=0.0132 <S**2>=2.187 |
| 166A -> 169A      | -0.43133                                          |
| 166A -> 170A      | 0.18222                                           |
| 168A -> 169A      | 0.18632                                           |
| 168A -> 170A      | 0.37315                                           |
| 168A -> 172A      | -0.15041                                          |
| 168A -> 173A      | 0.14023                                           |
| 166B -> 169B      | 0.61811                                           |
| 166B -> 170B      | -0.23848                                          |
| 167B -> 169B      | -0.16671                                          |
| Excited State 10: | 2.061-A 2.5868 eV 479.30 nm f=0.0003 <S**2>=0.812 |
| 161B -> 168B      | -0.54771                                          |
| 162B -> 168B      | 0.81277                                           |

(c) **2b<sup>2+</sup>** (HOMO = 167, LUMO = 168)

|                  |                                                     |
|------------------|-----------------------------------------------------|
| Excited State 1: | Singlet-A 1.2821 eV 967.03 nm f=0.0529 <S**2>=0.000 |
| 164 -> 168       | -0.19150                                            |
| 165 -> 168       | -0.20105                                            |
| 166 -> 168       | 0.45385                                             |
| 167 -> 168       | 0.46057                                             |

This state for optimization and/or second-order correction.

Total Energy, E(TD-HF/TD-KS) = -2076.13567202

Copying the excited state density for this state as the 1-particle RhoCI density.

|                  |                                                     |
|------------------|-----------------------------------------------------|
| Excited State 2: | Singlet-A 1.2935 eV 958.53 nm f=0.0551 <S**2>=0.000 |
| 164 -> 168       | -0.17771                                            |
| 165 -> 168       | 0.22126                                             |
| 166 -> 168       | -0.44728                                            |
| 167 -> 168       | 0.46229                                             |
| Excited State 3: | Singlet-A 1.9528 eV 634.91 nm f=0.2236 <S**2>=0.000 |
| 164 -> 169       | 0.10618                                             |
| 165 -> 168       | 0.61509                                             |
| 166 -> 168       | 0.26514                                             |
| 167 -> 169       | 0.15811                                             |
| Excited State 4: | Singlet-A 1.9992 eV 620.16 nm f=0.1907 <S**2>=0.000 |
| 164 -> 168       | 0.63781                                             |
| 165 -> 169       | -0.10379                                            |
| 166 -> 169       | -0.10076                                            |
| 167 -> 168       | 0.23395                                             |

|                   |           |           |           |          |              |
|-------------------|-----------|-----------|-----------|----------|--------------|
| Excited State 5:  | Singlet-A | 2.3287 eV | 532.43 nm | f=0.0005 | <S**2>=0.000 |
| 163 -> 168        | 0.70450   |           |           |          |              |
| Excited State 6:  | Singlet-A | 2.5676 eV | 482.88 nm | f=0.0399 | <S**2>=0.000 |
| 164 -> 169        | -0.10230  |           |           |          |              |
| 167 -> 169        | 0.66722   |           |           |          |              |
| Excited State 7:  | Singlet-A | 2.6776 eV | 463.04 nm | f=0.0101 | <S**2>=0.000 |
| 166 -> 169        | 0.67331   |           |           |          |              |
| Excited State 8:  | Singlet-A | 2.8232 eV | 439.16 nm | f=0.0017 | <S**2>=0.000 |
| 161 -> 168        | -0.31421  |           |           |          |              |
| 162 -> 168        | 0.62447   |           |           |          |              |
| Excited State 9:  | Singlet-A | 2.8849 eV | 429.77 nm | f=0.0004 | <S**2>=0.000 |
| 161 -> 168        | 0.62214   |           |           |          |              |
| 162 -> 168        | 0.30353   |           |           |          |              |
| Excited State 10: | Singlet-A | 2.9377 eV | 422.05 nm | f=0.0011 | <S**2>=0.000 |
| 160 -> 168        | 0.68458   |           |           |          |              |

## 8. ACID plots and NICS<sup>[S3]</sup> calculations

ACID plots (CSGT/B3LYP/6-31G+(d,p)) of **2b** and **2b**<sup>2+</sup> were calculated by using the method developed by Herges based on the optimized ground-state geometries.<sup>[S4]</sup> For ACID calculations, the magnetic field is perpendicular to the molecular center and points out through the paper. Blue and red arrows indicate paratropic (counterclockwise) and diatropic (clockwise) ring current, respectively. (Isovalue: 0.03)

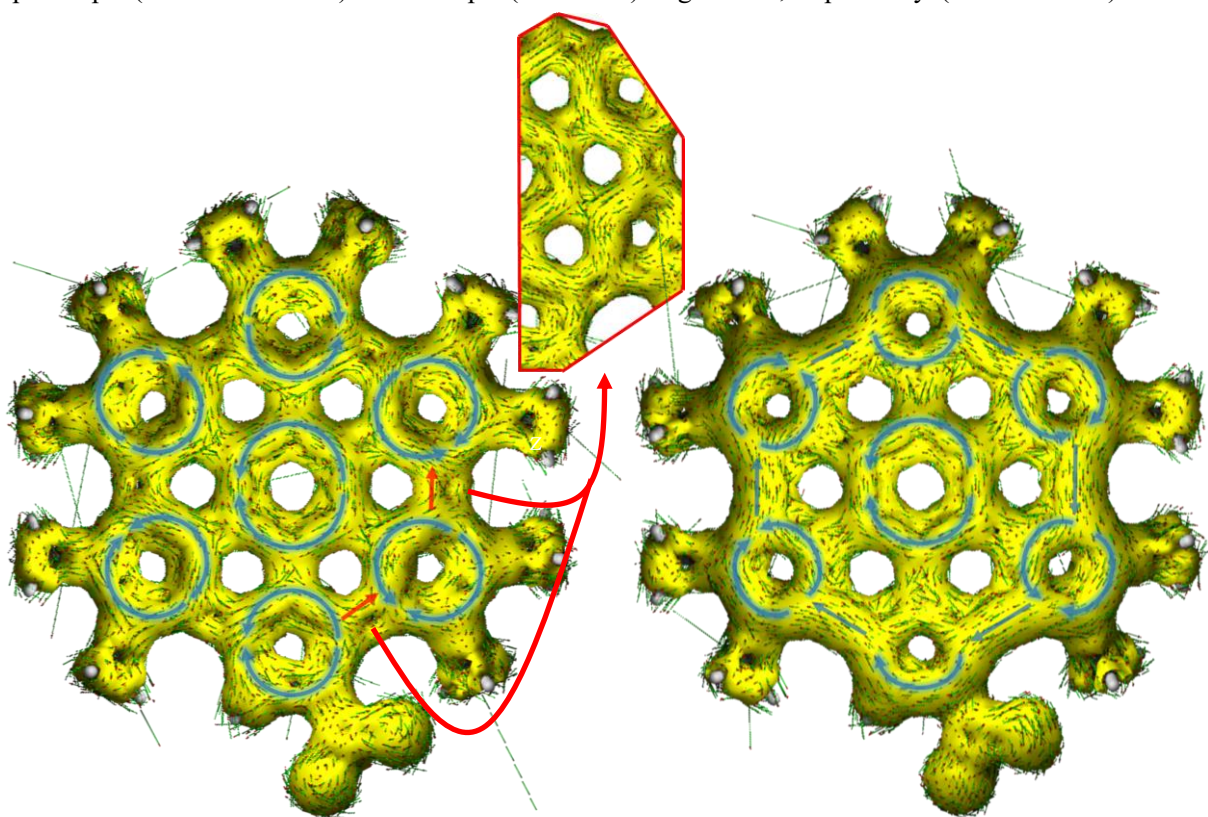

Figure S8a. ACID plots of **2b** (left) and **2b**<sup>2+</sup> (right).

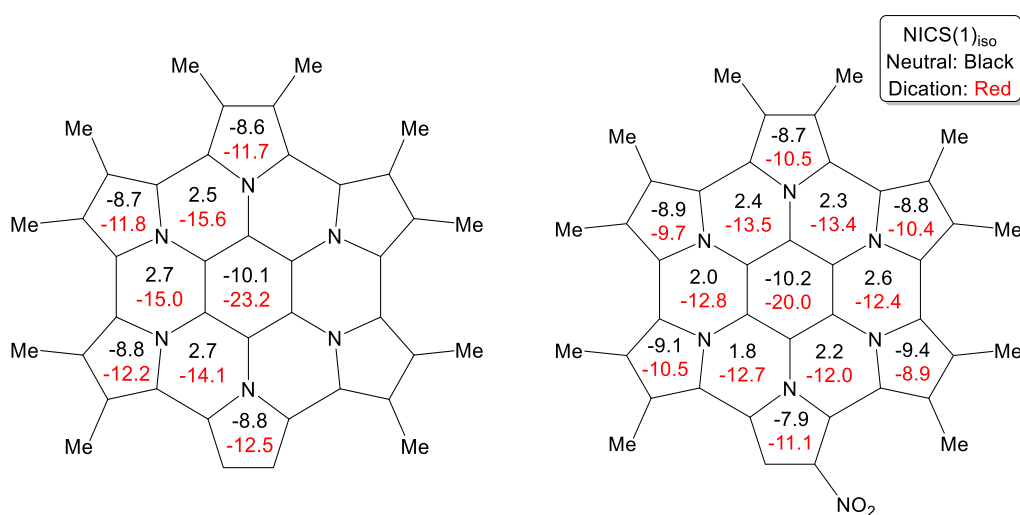

Figure S8b. NICS values of **1b/1b**<sup>2+</sup> (left) and **2b/2b**<sup>2+</sup> (right) (Calculated by HF/6-311G+(d,p)//B3LYP/6-31G(d,p)).

## 9. Possible resonance effect

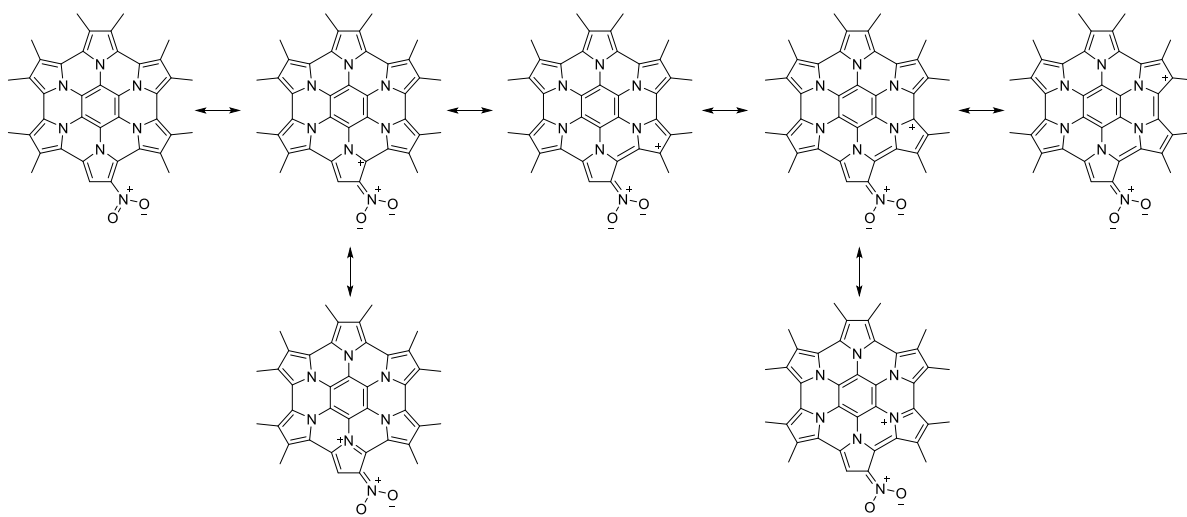

Scheme S9. Possible resonance structures of **2b**.

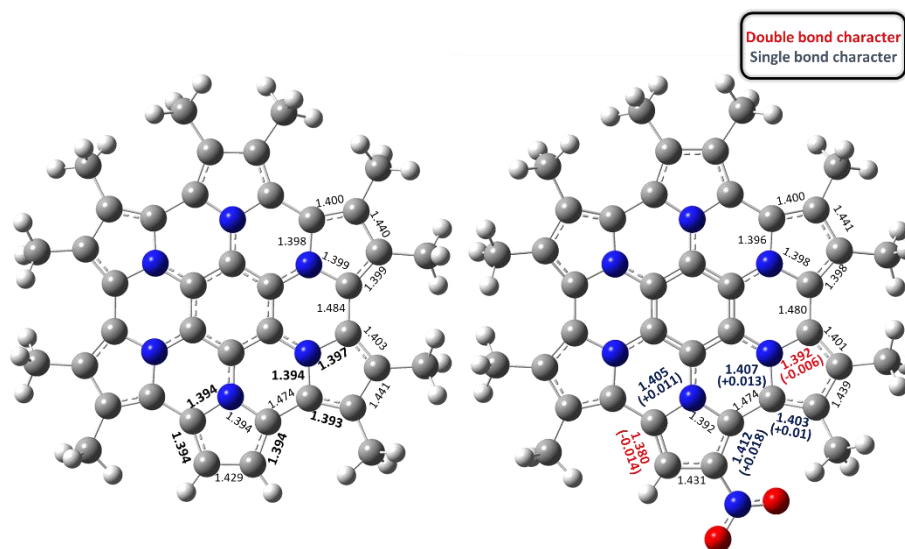

Figure S9a. Bond lengths of **1b** (left) and **2b** (right) in the optimized structures.

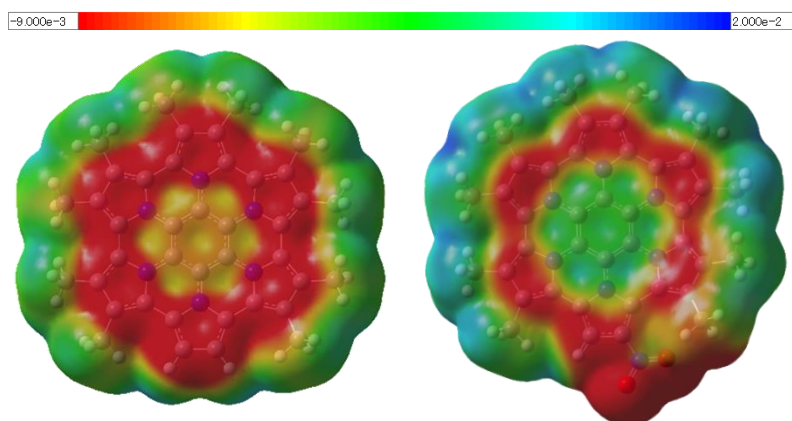

Figure S9b. ESP surface of **1b** (left) and **2b** (right).

## 10. Atomic coordinates of the optimized structures

The calculations were performed at the R(U)B3LYP/6-31G(d,p) level of theory.

### •Neutral **2b**

|                                       |                                       |
|---------------------------------------|---------------------------------------|
| N -2.26180300 -1.33292800 -0.05727000 | O -6.28305100 -0.56706000 0.67654200  |
| N 0.23377000 2.70937600 -0.04137700   | C -1.27142700 6.04016500 0.38597900   |
| N -2.18470000 1.40309800 0.01913600   | H -1.39636300 6.61075600 -0.54321300  |
| N 2.56539900 1.27328700 0.02035000    | H -2.26588400 5.80286600 0.76639700   |
| C -1.02007600 0.69099500 0.00713200   | H -0.80304000 6.71373000 1.10993400   |
| C -1.05433600 -0.68424600 -0.04337100 | C 1.85251400 5.97906600 0.45050200    |
| C -3.44809300 0.80373300 -0.13724000  | H 2.72196000 5.75900400 1.07295300    |
| C -2.21270100 2.78779500 -0.11858500  | H 2.21886900 6.39722900 -0.49587500   |
| C 0.19388600 1.34538000 -0.02365800   | H 1.29190800 6.77419000 0.94863600    |
| C 3.79474100 0.60635700 0.02794900    | C -4.11514700 4.44804200 -0.70740300  |
| C -0.91946800 3.49729000 0.00536400   | H -4.51834900 4.94305200 0.18517100   |
| C 1.41612300 3.43941600 0.09214900    | H -3.36016800 5.10638400 -1.14106200  |
| C -3.48297200 -0.66557800 -0.02301000 | H -4.93663100 4.37817700 -1.42565400  |
| C -4.39828800 -1.73371300 0.09991900  | C -5.76650900 1.80924500 -0.78278700  |
| C -3.54966200 3.09089300 -0.40600300  | H -6.02608500 0.86187800 -1.25320100  |
| C 4.74396400 1.63072600 0.09636100    | H -6.41325000 1.91117000 0.09426300   |
| C 0.99256200 4.76558900 0.24529900    | H -6.01986700 2.61328100 -1.47980500  |
| C -0.44758500 4.79934000 0.19749100   | C -1.60862400 -6.02500300 0.19757500  |
| C -4.31174500 1.87100800 -0.42490300  | H -1.51379000 -6.53603900 1.16369400  |
| C 1.36702700 0.62316600 0.00632200    | H -2.65686100 -5.74292900 0.07981000  |
| N 2.49290100 -1.47197200 0.05487400   | H -1.37915600 -6.76266200 -0.57958400 |
| N 0.08643400 -2.77225600 -0.04172300  | C 1.51112500 -6.15905700 0.24647600   |
| C 0.11928500 -1.40855200 -0.02901900  | H 1.76650700 -6.60266200 -0.72469800  |
| C -1.10011100 -3.49797800 0.02275000  | H 2.44236200 -6.01053900 0.79698200   |
| C 1.22872000 -3.57385200 0.00492500   | H 0.92660700 -6.90603300 0.79146000   |
| C 1.33058900 -0.75489600 0.02622700   | C 4.48036000 -4.53110900 -0.43931900  |
| C 2.68080200 2.66638400 0.06712600    | H 4.82215200 -4.98679900 0.49901600   |
| C 2.52846800 -2.86659000 -0.05360300  | H 3.76661300 -5.21592500 -0.89929500  |
| C 3.75228200 -0.87317700 -0.04230500  | H 5.34989600 -4.48116600 -1.10103500  |
| C -2.35713300 -2.73282100 0.01964900  | C 6.12223500 -1.86991800 -0.42474100  |
| C -3.71057500 -2.98869100 0.10320300  | H 6.41222900 -0.96383400 -0.95940700  |
| H -4.20507600 -3.94114300 0.19582400  | H 6.67488500 -1.88854600 0.52347900   |
| C 0.73433600 -4.88125600 0.11180200   | H 6.47939800 -2.71934200 -1.01325300  |
| C 4.05950400 2.89854100 0.09168400    | C 6.23688800 1.49672600 0.19693200    |
| C 4.63599100 -1.94265300 -0.22651800  | H 6.52224800 0.57680900 0.70945000    |
| C 3.88107700 -3.17038400 -0.23315100  | H 6.73073400 1.49661300 -0.78375000   |
| C -0.70469800 -4.83079500 0.10842600  | H 6.66196500 2.32718700 0.76759500    |
| N -5.79877600 -1.65916600 0.35113400  | C 4.77115200 4.22159400 0.09305400    |
| O -6.44923300 -2.70915300 0.26897200  | H 4.21464700 4.97761500 -0.46282800   |

H 4.93747500 4.61096900 1.10603900  
H 5.75285400 4.13324100 -0.38009000

•Radical cation **2b**<sup>+</sup>

|                                       |                                       |
|---------------------------------------|---------------------------------------|
| N -2.23586900 -1.37141000 -0.11592200 | C -0.61268000 -4.84596400 0.03821300  |
| N 0.18260600 2.70418400 -0.06195200   | N -5.76511300 -1.76670600 0.39217400  |
| N -2.20386700 1.36021400 -0.03060400  | O -6.40150000 -2.81132700 0.25394300  |
| N 2.53473300 1.31078600 -0.03224600   | O -6.23097300 -0.69803600 0.79554400  |
| C -1.03288100 0.66930700 -0.07485900  | C -1.36053300 6.02481500 0.32042900   |
| C -1.04386700 -0.70308600 -0.13425900 | H -1.59563900 6.50024700 -0.63920600  |
| C -3.45942200 0.74589800 -0.12535400  | H -2.30231100 5.79083000 0.81802300   |
| C -2.25522300 2.75303600 -0.11130100  | H -0.85097300 6.77306900 0.93109400   |
| C 0.16684300 1.34339100 -0.09221300   | C 1.76797400 6.00705800 0.35068800    |
| C 3.76981700 0.66107600 -0.00133000   | H 2.58443400 5.83703500 1.05495700    |
| C -0.97778800 3.47079100 -0.01747000  | H 2.20725000 6.32759400 -0.60119000   |
| C 1.36137100 3.44753700 0.04968800    | H 1.18349300 6.84755400 0.72761100    |
| C -3.46712700 -0.72191600 -0.03802600 | C -4.23097100 4.39753700 -0.51587200  |
| C -4.35727000 -1.81415000 0.10692700  | H -4.54172500 4.85710000 0.43004800   |
| C -3.62322100 3.04217800 -0.30876400  | H -3.53596400 5.07792900 -1.00917600  |
| C 4.71238600 1.72039300 0.08800900    | H -5.12272500 4.33281000 -1.14263400  |
| C 0.91216100 4.78655700 0.18469300    | C -5.83198000 1.73668700 -0.59891000  |
| C -0.51213100 4.79908000 0.15156400   | H -6.10029900 0.80601700 -1.09642300  |
| C -4.36073700 1.81729300 -0.32718300  | H -6.41996900 1.78479800 0.32241800   |
| C 1.34913500 0.64327800 -0.08105500   | H -6.14610800 2.56365800 -1.24008000  |
| N 2.50709500 -1.42557800 -0.03974600  | C -1.50583300 -6.04829300 0.12317800  |
| N 0.13395700 -2.76538100 -0.10817300  | H -1.49713400 -6.48783300 1.12750400  |
| C 0.13979700 -1.40492400 -0.12768200  | H -2.54039200 -5.79526100 -0.11632600 |
| C -1.03630000 -3.50831000 -0.04469300 | H -1.19136300 -6.82809400 -0.57677000 |
| C 1.29526500 -3.54300400 -0.05161500  | C 1.61709900 -6.13514300 0.16014000   |
| C 1.33636300 -0.73084100 -0.08708500  | H 1.99518700 -6.47248700 -0.81230300  |
| C 2.61973700 2.70241600 0.03322000    | H 2.47331700 -6.01412700 0.82656800   |
| C 2.56884100 -2.81621800 -0.07167100  | H 1.00242900 -6.94260900 0.56317800   |
| C 3.75797400 -0.80000000 -0.04750900  | C 4.57603100 -4.46649000 -0.19616800  |
| C -2.29893600 -2.76891700 -0.03384200 | H 4.67557400 -4.92365800 0.79539400   |
| C -3.65598100 -3.04713200 0.08997600  | H 3.98396000 -5.14075600 -0.81680600  |
| H -4.13125300 -4.00848400 0.19870100  | H 5.57705800 -4.42365800 -0.62906200  |
| C 0.81540700 -4.87203600 0.04544100   | C 6.17635100 -1.77087400 -0.16467700  |
| C 4.01544700 2.95935500 0.08567400    | H 6.49756900 -0.94847700 -0.80573500  |
| C 4.68119800 -1.87662500 -0.10798500  | H 6.61334700 -1.61400600 0.82846100   |
| C 3.95711500 -3.10229000 -0.12264800  | H 6.61915200 -2.68449400 -0.56455700  |

C 6.20358700 1.59061600 0.19482900  
H 6.48553800 0.76174000 0.84594800  
H 6.67498000 1.42454700 -0.78102900  
H 6.64392100 2.49477200 0.61789700

C 4.68175300 4.30377200 0.11841300  
H 4.16780700 5.01903900 -0.52518900  
H 4.71144700 4.72535200 1.13013100  
H 5.71176100 4.23685400 -0.23552600

• Dication **2b**<sup>2+</sup>

N -2.27807700 -1.27232800 0.23457300  
N 0.29599900 2.68457000 0.26475100  
N -2.14208300 1.45135400 0.27926100  
N 2.58163400 1.19961900 0.26523000  
C -1.00635200 0.71427900 0.43263200  
C -1.06993500 -0.65764900 0.39890000  
C -3.39999800 0.88237100 0.07007500  
C -2.11659200 2.83711900 0.07294900  
C 0.22256200 1.33440500 0.42373700  
C 3.77730100 0.49517600 0.12102500  
C -0.82507900 3.49169500 0.12253800  
C 1.51123900 3.37132300 0.15273000  
C -3.47804100 -0.56930300 0.13443500  
C -4.42198300 -1.63195600 0.01671900  
C -3.46589600 3.16956600 -0.25924900  
C 4.77093200 1.52761500 -0.03437900  
C 1.11905800 4.74638500 0.00826100  
C -0.28791500 4.81987900 -0.00236000  
C -4.24191700 1.98464200 -0.27910900  
C 1.37512500 0.58501400 0.41852700  
N 2.44070500 -1.52631300 0.25132800  
N 0.01754100 -2.75876900 0.23312300  
C 0.08179400 -1.40926400 0.39711200  
C -1.17980400 -3.44359100 0.10564500  
C 1.14664500 -3.57451600 0.08785400  
C 1.30675100 -0.78730600 0.41247200  
C 2.71602200 2.58256000 0.14127900  
C 2.43063500 -2.90586000 0.07933400  
C 3.70512700 -0.94335400 0.09535800  
C -2.39667400 -2.65899100 0.11794500  
C -3.77938300 -2.87720800 -0.01651400  
H -4.29739800 -3.81929000 -0.10808500  
C 0.60353000 -4.88858300 -0.08610900  
C 4.13178800 2.77983700 -0.03818900

C 4.57707900 -2.06310300 -0.14037000  
C 3.80895800 -3.24361600 -0.14880300  
C -0.80950100 -4.80157700 -0.08230800  
N -5.86748500 -1.53471800 0.06597800  
O -6.50113400 -2.47305200 -0.40228100  
O -6.33385500 -0.53900100 0.61718900  
C -1.07985300 6.08797000 -0.09962900  
H -1.37592500 6.30451800 -1.13223900  
H -1.98319300 6.04113800 0.50856700  
H -0.49774600 6.94067800 0.25170300  
C 2.03796200 5.92301100 -0.11276800  
H 2.83804700 5.88767500 0.62851000  
H 2.49700300 5.97202700 -1.10613400  
H 1.49915400 6.85889800 0.03279700  
C -3.99046000 4.53808200 -0.56970600  
H -4.06298500 5.15079900 0.33538600  
H -3.35402400 5.06312600 -1.28447400  
H -4.99098900 4.48933100 -0.99740300  
C -5.68282400 1.91836600 -0.67942900  
H -5.89190500 1.03222800 -1.27926900  
H -6.34175300 1.87722000 0.19225600  
H -5.96048000 2.78934300 -1.27337500  
C -1.75319700 -5.95354600 -0.25218300  
H -1.67033000 -6.65812700 0.58257000  
H -2.79171500 -5.62413600 -0.29883600  
H -1.54143000 -6.50828500 -1.17120500  
C 1.34967600 -6.17709800 -0.25294100  
H 1.75033800 -6.28508400 -1.26722200  
H 2.18172900 -6.25993900 0.44837800  
H 0.68795800 -7.02649500 -0.07726900  
C 4.33511200 -4.62871800 -0.36752700  
H 4.24367800 -5.23454200 0.53998800  
H 3.79508100 -5.13931900 -1.16815300  
H 5.38887800 -4.61874200 -0.64227700

|   |            |             |             |   |            |            |             |
|---|------------|-------------|-------------|---|------------|------------|-------------|
| C | 6.05823900 | -1.99651300 | -0.35415400 | H | 6.53283300 | 1.00971300 | -1.17067200 |
| H | 6.31880400 | -1.29017100 | -1.14520500 | H | 6.79526500 | 2.23463900 | 0.06565100  |
| H | 6.58005000 | -1.69111900 | 0.55860400  | C | 4.82194400 | 4.09789900 | -0.21169200 |
| H | 6.46068500 | -2.96656600 | -0.64233600 | H | 4.37803500 | 4.67510500 | -1.02583200 |
| C | 6.24946100 | 1.31850900  | -0.15846100 | H | 4.76739500 | 4.70290500 | 0.69895500  |
| H | 6.60230800 | 0.55696700  | 0.53812400  | H | 5.87570100 | 3.96431200 | -0.45235900 |



## 11. References

[S1] (a) CrystalStructure: Reflection collection, data reduction, and crystal structure analysis packages, Rigaku (3-9-12 Akishima, Tokyo, Japan) and Rigaku/MSC (9009 New Trails Dr., The Woodlands, TX 77381 USA). (b) Sheldrick, G. M. *Acta. Cryst.* **2014**, *A70*, C1437. (c) SHELXL: Sheldrick, G. M. *Acta Crystallogr.* **2008**, *A78*, 112.

[S2] Gaussian 09, Revision D.01, Frisch, M. J.; Trucks, G. W.; Schlegel, H. B.; Scuseria, G. E.; Robb, M. A.; Cheeseman, J. R.; Scalmani, G.; Barone, V.; Mennucci, B.; Petersson, G. A.; Nakatsuji, H.; Caricato, M.; Li, X.; Hratchian, H. P.; Izmaylov, A. F.; Bloino, J.; Zheng, G.; Sonnenberg, J. L.; Hada, M.; Ehara, M.; Toyota, K.; Fukuda, R.; Hasegawa, J.; Ishida, M.; Nakajima, T.; Honda, Y.; Kitao, O.; Nakai, H.; Vreven, T.; Montgomery, Jr., J. A.; Peralta, J. E.; Ogliaro, F.; Bearpark, M.; Heyd, J. J.; Brothers, E.; Kudin, K. N.; Staroverov, V. N.; Keith, T.; Kobayashi, R.; Normand, J.; Raghavachari, K.; Rendell, A.; Burant, J. C.; Iyengar, S. S.; Tomasi, J.; Cossi, M.; Rega, N.; Millam, J. M.; Klene, M.; Knox, J. E.; Cross, J. B.; Bakken, V.; Adamo, C.; Jaramillo, J.; Gomperts, R.; Stratmann, R. E.; Yazyev, O.; Austin, A. J.; Cammi, R.; Pomelli, C.; Ochterski, J. W.; Martin, R. L.; Morokuma, K.; Zakrzewski, V. G.; Voth, G. A.; Salvador, P.; Dannenberg, J. J.; Dapprich, S.; Daniels, A. D.; Farkas, O.; Foresman, J. B.; Ortiz, J. V.; Cioslowski, J. and Fox, D. J. Gaussian, Inc., Wallingford CT, **2013**.

[S3] Schleyer, P. v. R.; Maerker, C.; Dransfeld, A.; Jiao, H.; Hommes, N. J. R. v. E. *J. Am. Chem. Soc.* **1996**, *118*, 6317.

[S4] Geuenich, D.; Hess, K.; Köhler, F.; Herges, R. *Chem. Rev.* **2005**, *105*, 3758.
